# Supplementary material for: Preparation and Characterization of Polymer Composite Materials Based on PLA/TiO2 for Antibacterial Packaging
Source: PubMed Central journal article supplement (PMC6401929; doi:10.3390/polym10121365), 2018-12-09
Supplement: polymers-10-01365-s001.pdf [file polymers-10-01365-s001.pdf]

# Preparation and Characterization of Polymer Composite Materials Based on PLA/TiO<sub>2</sub> for Antibacterial Packaging

Edwin A. Segura González <sup>1,2</sup>, Dania Olmos <sup>2,\*</sup>, Miguel Ángel Lorente <sup>2</sup>, Itziar Vélaz <sup>3</sup> and Javier González-Benito <sup>2,\*</sup>

<sup>1</sup> Dirección de Investigación, Universidad Interamericana de Panamá, Ciudad de Panamá, Panamá; edwin\_segura@uip.edu.pa

<sup>2</sup> Department of Materials Science and Engineering and Chemical Engineering, Instituto de Química y Materiales Álvaro Alonso Barba (IQMAA), Universidad Carlos III de Madrid, Leganés 28911, Madrid, Spain; malorente@ing.uc3m.es

<sup>3</sup> Departamento de Química, Facultad de Ciencias, Universidad de Navarra, 31080 Pamplona, Navarra, Spain; itzvelaz@unav.es

\* Correspondence: dolmos@ing.uc3m.es (D.O.); javid@ing.uc3m.es (J.G.-B.); Tel.: +34-916249447 (D.O.); +34-916248870 (J.G.-B.)

Received: date; Accepted: date; Published: date

## 3. Results and discussion

### 3.1. Structural characterization.

#### X-Ray Diffraction

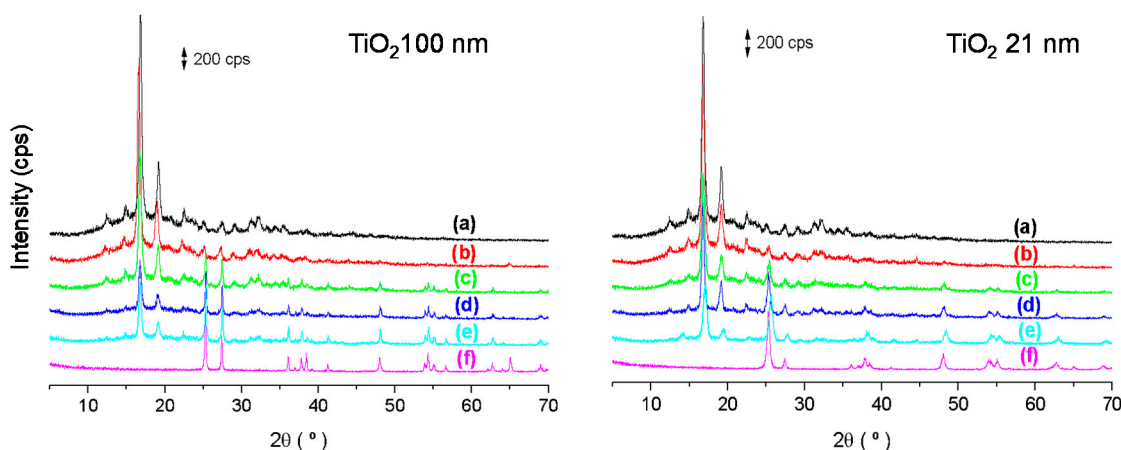

**Figure S1.**-X-Ray Diffraction patterns for the samples with TiO<sub>2</sub>-100nm (left) and TiO<sub>2</sub>-21nm (right) as a function of the content in TiO<sub>2</sub> nanoparticles: a) PLA-0; b) PLA/TiO<sub>2</sub>-1; c) PLA/TiO<sub>2</sub>-5; d) PLA/TiO<sub>2</sub>-10; e) PLA/TiO<sub>2</sub>-20 and f) pure TiO<sub>2</sub>-100nm (left) or pure TiO<sub>2</sub>-21 nm (right).

In both plots, the characteristic peaks of PLA-0 and TiO<sub>2</sub> were observed. Crystalline peaks in the nanocomposite materials associated with PLA appear in the interval of 2 $\theta$  = 15-25°. As the content of nanoparticles increases in the polymer matrix, the appearance of peaks from TiO<sub>2</sub> can

be observed. The peaks associated to TiO<sub>2</sub> showed lines that belonged to both anatase and rutile (see **Table S1**).

**Table S1.** XRD peaks of both polymorphs of TiO<sub>2</sub>.

| TiO <sub>2</sub> (Rutile) |       | TiO <sub>2</sub> (Anatase) |         |
|---------------------------|-------|----------------------------|---------|
| 2θ (°)                    | (hkl) | 2θ (°)                     | (hkl)   |
| 27.4                      | 110   | 25.3                       | 101     |
| 36.1                      | 101   | 36.9                       | 112     |
| 41.2                      | 111   | 37.8                       | 004     |
| 54.3                      | 211   | 38.4                       | 112     |
| 56.6                      | 220   | 48.0                       | 200     |
| 64.0                      | 310   | 53.9                       | 105     |
| 65.0                      | 221   | 55.0                       | 211     |
|                           |       | 62.7                       | 215/204 |
|                           |       | 69                         | 116     |

*Fourier Transformed Infrared Spectroscopy (FTIR)*

**Table S2.** Band assignment for the PLA infrared spectrum in the MID-IR region <sup>1,2</sup>

| Frequency (cm <sup>-1</sup> ) | Band assignment                    | Frequency (cm <sup>-1</sup> ) | Band assignment                                            |
|-------------------------------|------------------------------------|-------------------------------|------------------------------------------------------------|
| 2997                          | ν <sub>as</sub> (CH <sub>3</sub> ) | 1209                          | ν <sub>as</sub> (COC) + ρ <sub>as</sub> (CH <sub>3</sub> ) |
| 2945                          | ν <sub>s</sub> (CH <sub>3</sub> )  | 1180                          | ⊙ <sub>as</sub> COC + ρ <sub>as</sub> CH <sub>3</sub> )    |
| 2920                          | ⊙ <sub>as</sub> (CH <sub>2</sub> ) | 1128                          | ρ <sub>as</sub> (CH <sub>3</sub> )                         |
| 2881                          | ⊙(CH <sub>3</sub> )                | 1082                          | ⊙ <sub>s</sub> (COC)                                       |
| 2850                          | ⊙ <sub>s</sub> (CH <sub>2</sub> )  | 1043                          | ⊙(C-CH <sub>3</sub> )                                      |
| 1747                          | ⊙(C=O)                             | 957                           | CH <sub>3</sub> + ⊙CC                                      |
| 1452                          | δ <sub>as</sub> (CH <sub>3</sub> ) | 918                           | ρ(CH <sub>3</sub> + ⊙CC)                                   |
| 1381                          | δ <sub>s</sub> (CH <sub>3</sub> )  | 868                           | ⊙(C-COO)                                                   |
| 1359                          | δ <sub>as</sub> (CH <sub>3</sub> ) | 756                           | δ(C=O)                                                     |
| 1304                          | δ(CH)                              | 700                           | γ(C=O)                                                     |
| 1267                          | ⊙ <sub>as</sub> (COC) + δ(CH)      |                               |                                                            |

<sup>1</sup>Auras R et al. *Macromol Biosci* 2004;4: 835–64. <sup>2</sup>Krikorian V, Pochan DJ. *Macromolecules* 2005; 38: 6520–7.

### 3.2. Thermal characterization.

#### Differential Scanning Calorimetry (DSC)

**Table S3.** Characteristic transition temperatures ( $T_g$ ,  $T_c$  and  $T_m$ ) obtained from the second heating scan in DSC experiments.

| Sample                       | $T_g$ (°C) | $T_c$ (°C) | $T_m$ (°C) |
|------------------------------|------------|------------|------------|
| PLA-0                        | 64.6       | 136.9      | 166.8      |
| PLA/TiO <sub>2</sub> -100-1  | 64.5       | 137.5      | 167.4      |
| PLA/TiO <sub>2</sub> -100-5  | 64.2       | 137.2      | 167.1      |
| PLA/TiO <sub>2</sub> -100-10 | 64.5       | 136.7      | 166.7      |
| PLA/TiO <sub>2</sub> -100-20 | 64.5       | 136.9      | 167.7      |
| PLA/TiO <sub>2</sub> -21-1   | 64.6       | 136.9      | 167.8      |
| PLA/TiO <sub>2</sub> -21-5   | 64.6       | 136.9      | 166.5      |
| PLA/TiO <sub>2</sub> -21-10  | 64.8       | 137.4      | 167.9      |
| PLA/TiO <sub>2</sub> -21-20  | 65.3       | 136.3      | 167.4      |

#### Thermogravimetry Analysis (TGA)

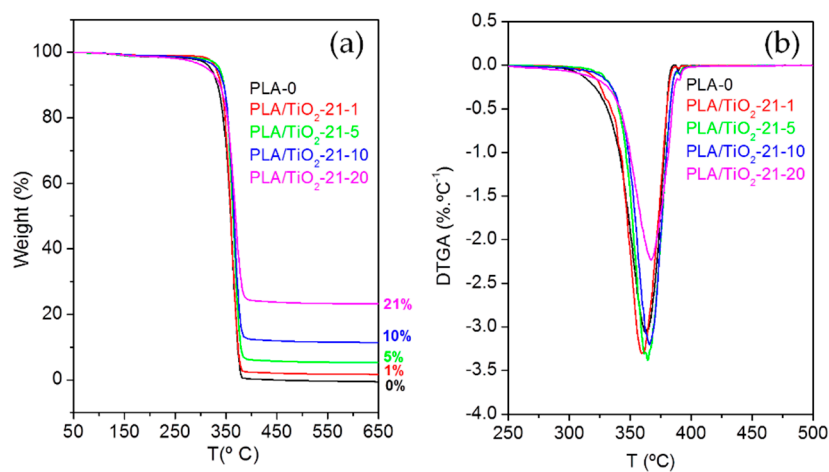

**Figure S2.** (a) Thermogravimetric analysis curve and (b) DTGA curve for the systems based on PLA/TiO<sub>2</sub>-21.

### 3.3. Antimicrobial behaviour.

#### 3.3.1. Study of biofilm development on the surface of the materials

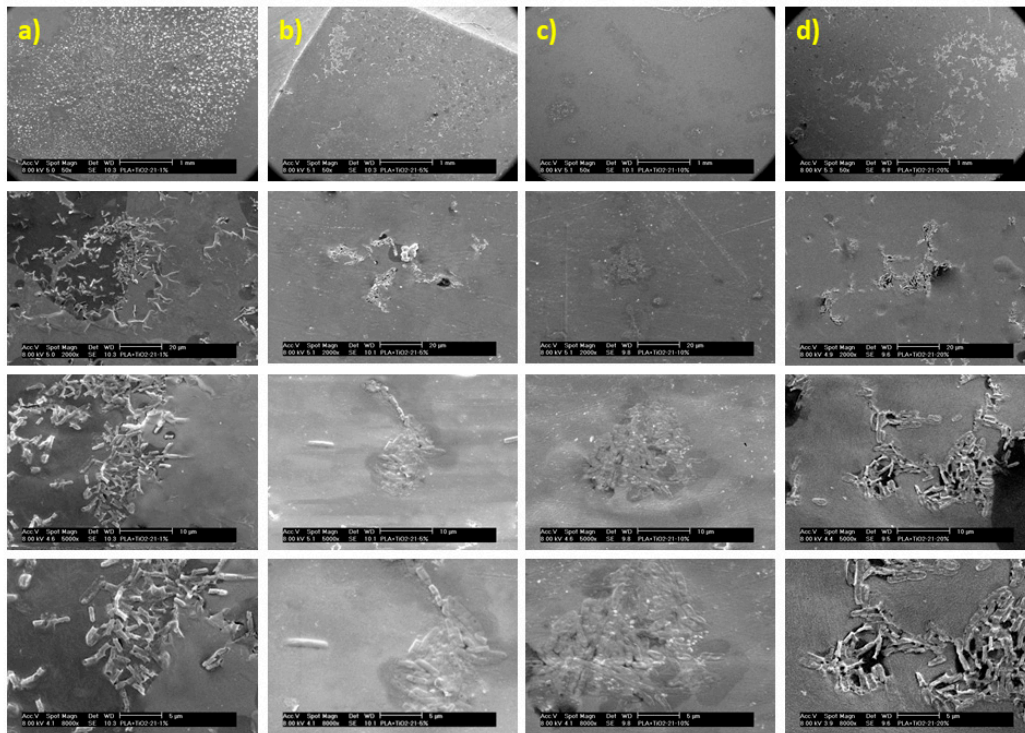

**Figure S3.** From top to bottom: Each row corresponds to SEM micrographs obtained at different magnifications: 50 ×; 2000 ×; 5000 × and 8000 × PLA/TiO<sub>2</sub> nanocomposite materials ( $\phi \sim 21$  nm) as a function of the content in TiO<sub>2</sub> nanoparticles in each column: a) 1%; b) 5%; c) 10% and d) 20% (wt%).

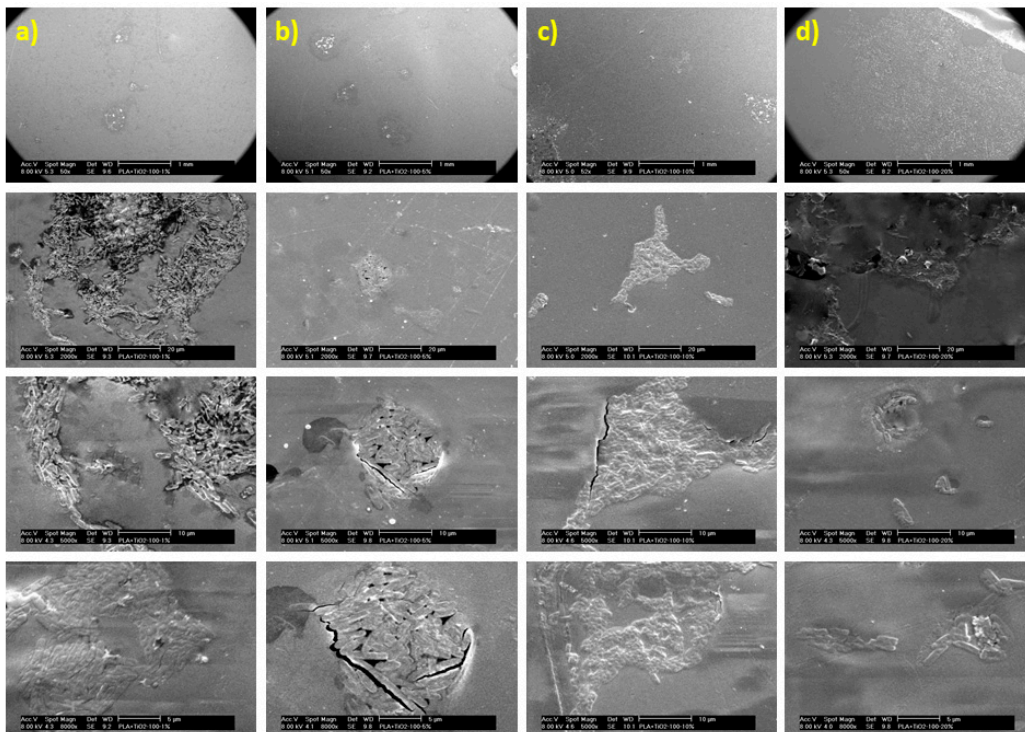

**Figure S4.** From top to bottom: Each row corresponds to SEM micrographs obtained at different magnifications: 50 ×; 2000 ×; 5000 × and 8000 × PLA/TiO<sub>2</sub> nanocomposite materials ( $\phi < 100$  nm) as a function of the content in TiO<sub>2</sub> nanoparticles in each column: a) 1%; b) 5%; c) 10% and d) 20% (wt%).
